# Supplementary material for: Donor site reconstruction by adjacent half-width metatarsal after full-width metatarsal transfer for metacarpal reconstruction in severe thumb hypoplasia
Source: PubMed Central journal article supplement — Chin Med J (Engl). 2023 Jun 19;136(17):2104–6. doi: 10.1097/CM9.0000000000002552 (PMC10476705; doi:10.1097/cm9.0000000000002552), 2023-06-19
Supplement: cm9-136-2104-s001.pdf [file cm9-136-2104-s001.pdf]

**Supplementary Table 1: Demographic data and results of patients.**

| Patient number | Sex | Procedure | Age at operation | Follow-up | Type of thumb |      | Donor side | Appearances |         | Radiographic Findings  |                      | Parental Satisfaction*          |          |   |
|----------------|-----|-----------|------------------|-----------|---------------|------|------------|-------------|---------|------------------------|----------------------|---------------------------------|----------|---|
|                |     |           |                  |           | Manske        | JST  |            | 2nd/4th Toe | 3rd Toe | 2nd/4th Metatarsal     | 3rd Metatarsal       | Appearance                      | Function |   |
| P1             | M   | NF4MTT    | 14m              | 12m       | IV            | IIID | L          | N           | N       | Synostosis             | Synostosis, widening | 5                               | 5        |   |
| P2             | F   | NF4MTT    | 16m              | 12m       | IIIB          | IIIC | R          | N           | N       | N                      | N                    | 5                               | 5        |   |
| P3             | M   | NF4MTT    | 15m              | 15m       | IIIB          | IIIC | R          | N           | N       | N                      | Lengthening          | 2                               | 5        |   |
| P4             | F   | NF4MTT    | 22m              | 12m       | IV            | IV   | R          | N           | N       | N                      | N                    | 4                               | 4        |   |
| P5             | F   | NF4MTT    | 22m              | 13m       | IIIB          | IIIC | L          | N           | N       | N                      | N                    | 4                               | 4        |   |
| P6             | F   | NF4MTT    | 21m              | 17m       | IIIB          | IIIC | L          | N           | N       | Deformity (angulation) | N                    | 3                               | 3        |   |
| P7             | M   | NF4MTT    | 17m              | 26m       | IIIB          | IIIC | L          | N           | N       | Deformity (deviation)  | Synostosis           | Synostosis                      | 5        | 5 |
| P8             | M   | NF4MTT    | 20m              | 23m       | IIIB          | IIIB | L          | N           | N       | N                      | N                    | 5                               | 5        |   |
| P9             | M   | NF4MTT    | 22m              | 21m       | IIIB          | IIIC | R          | N           | N       | Synostosis, non-union  | Synostosis           | 5                               | 5        |   |
| P10            | M   | NF4MTT    | 2y7m             | 14m       | IIIB          | IIIC | L          | Lengthening | N       | N                      | N                    | 4                               | 5        |   |
| P11            | F   | NF4MTT    | 2y1m             | 19m       | IV            | IIID | R          | N           | N       | N                      | N                    | 3                               | 3        |   |
| P12            | M   | NF4MTT    | 16m              | 30m       | IV            | IIID | L          | N           | N       | N                      | N                    | 5                               | 5        |   |
| P13            | M   | NF4MTT    | 3y               | 13m       | IIIB          | IIIB | R          | N           | N       | Shortening             | Widening             | Widening                        | 4        | 5 |
| P14            | F   | NF4MTT    | 21m              | 30m       | IV            | IV   | L          | N           | N       | N                      | N                    | 4                               | 4        |   |
| P15            | F   | NF4MTT    | 17m              | 36m       | IV            | IV   | R          | N           | N       | Shortening             | Synostosis           | Synostosis, deformity (curving) | 5        | 5 |
| P16            | M   | VF2MTFT   | 2y3m             | 17m       | IV            | IV   | R          | N           | N       | N                      | N                    | 5                               | 5        |   |
| P17            | F   | VF2MTFT   | 3y10m            | 12m       | IV            | IV   | L          | N           | N       | N                      | Synostosis           | Synostosis                      | 4        | 4 |

|     |   |         |       |     |      |      |   |   |   |          |   |   |   |
|-----|---|---------|-------|-----|------|------|---|---|---|----------|---|---|---|
| P18 | M | VF2MTFT | 4y5m  | 13m | IIIB | IIIB | R | N | N | Widening | N | 5 | 4 |
| P19 | M | VF2MTFT | 4y11m | 11m | IV   | IIID | L | N | N | N        | N | 5 | 5 |
| P20 | M | VF2MTFT | 10y7m | 13m | IIIB | IIIC | L | N | N | N        | N | 5 | 5 |

NF4MTT: Non-vascularized full-width 4th metatarsal transfer; VF2MTFT: Vascularized full-width 2nd metatarsal flap transfer; M: Male; F: Female; L: Left; R: Right; N: Normal. The synostosis was between the 2nd/4th metatarsal and the 3rd metatarsal. \*Scores of satisfactions and the corresponding answers: 5 – very satisfied, 4 – somewhat satisfied, 3 – fair, 2–4 – somewhat dissatisfied, 1 – very dissatisfied.

**Supplementary Table 2: The length and width of the metatarsals at postoperation and follow-up.**

| Metatarsal     | Number of patients | Postoperation         |                          |                             |           | Follow-up       |                          |            |         |
|----------------|--------------------|-----------------------|--------------------------|-----------------------------|-----------|-----------------|--------------------------|------------|---------|
|                |                    | Donor side (mm)       | Contra lateral side (mm) | Statistics                  | P-value   | Donor side (mm) | Contra lateral side (mm) | Statistics | P-value |
| Length         |                    |                       |                          |                             |           |                 |                          |            |         |
| 4th metatarsal | 12                 | 25.67<br>(3.60)*      | 25.44<br>(3.35)*         | Z = -0.4<br>71 <sup>†</sup> | 0.63<br>8 | 34.66 ± 6.23    | 33.48 ± 5.62             | t = 2.633  | 0.023   |
| 2nd metatarsal | 4                  | 43.94 ± 11.53         | 42.17 ± 11.12            | t = 3.301                   | 0.04<br>6 | 48.52 ± 7.46    | 47.65 ± 9.02             | t = 0.836  | 0.465   |
| 3rd metatarsal | 16                 | 27.30<br>(10.34)<br>* | 27.52<br>(10.97)<br>*    | Z = -0.7<br>76 <sup>†</sup> | 0.43<br>8 | 37.33 ± 8.10    | 36.54 ± 8.95             | t = 2.179  | 0.046   |
| Width          |                    |                       |                          |                             |           |                 |                          |            |         |
| 4th metatarsal | 12                 | N/A                   | N/A                      | N/A                         | N/A       | 4.37 ± 0.82     | 4.31 ± 0.41              | t = 0.396  | 0.699   |
| 2nd metatarsal | 4                  | N/A                   | N/A                      | N/A                         | N/A       | 6.18 ± 0.79     | 5.70 ± 0.97              | t = 0.944  | 0.415   |
| 3rd metatarsal | 16                 | N/A                   | N/A                      | N/A                         | N/A       | 4.96 ± 1.14     | 4.77 ± 0.88              | t = 0.926  | 0.369   |

; N/A: Not applicable. \*Medians (interquartile spacing) were calculated.

<sup>†</sup>Wilcoxon signed-rank test was used.

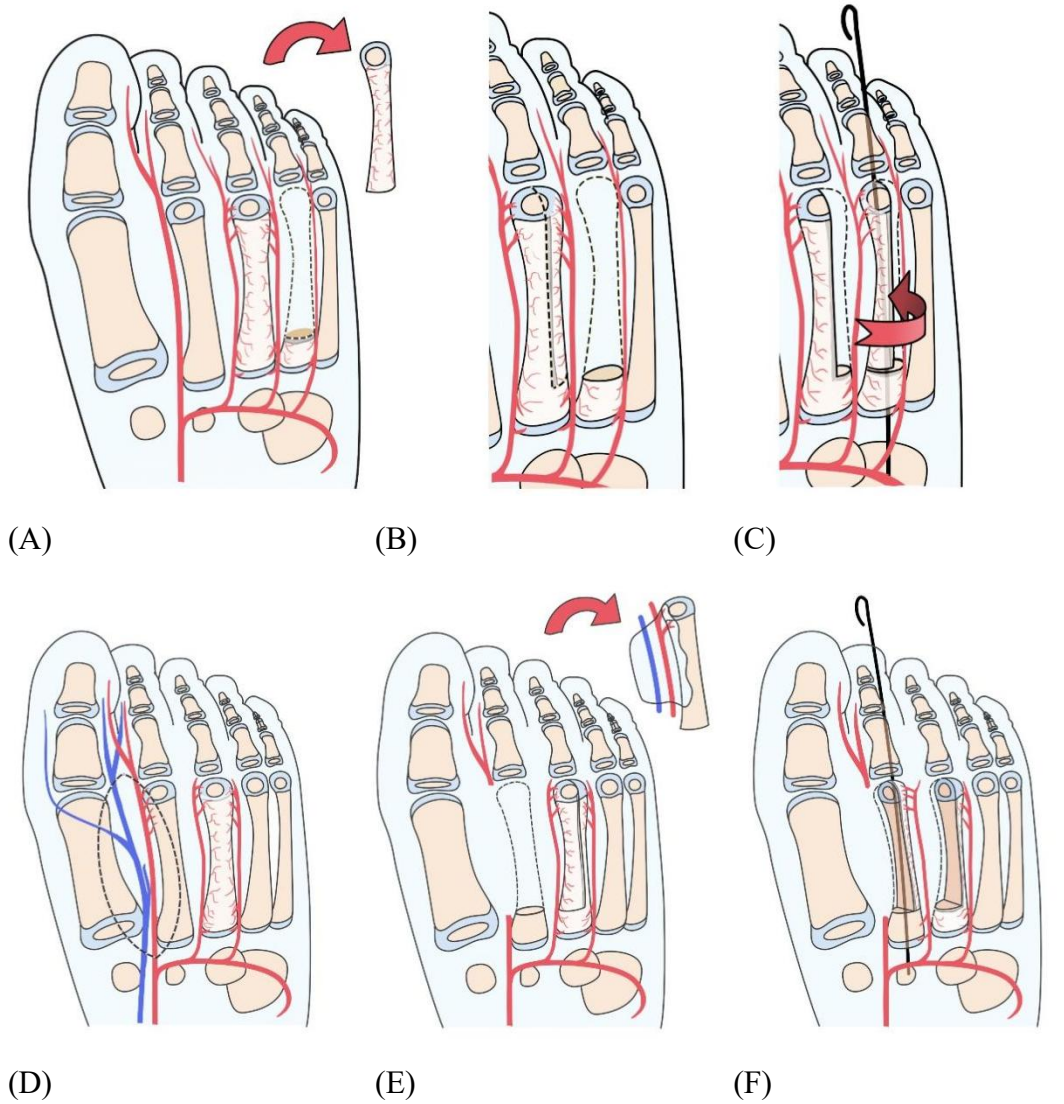

**Supplementary Figure 1:** Surgical techniques. The harvest of full-width graft of the 4th metatarsal (A), the osteotomy of the 3rd metatarsal (B), and the reconstruction of donor bone defect using the lateral half of the 3rd metatarsal (C) in non-vascularized 4th metatarsal transfer. The design of flap (D), the osteotomy of the 2nd and the 3rd metatarsals (E), and the reconstruction of the donor bone defect using the medial half of the 3rd metatarsal (F) in vascularized 2nd metatarsal transfer.

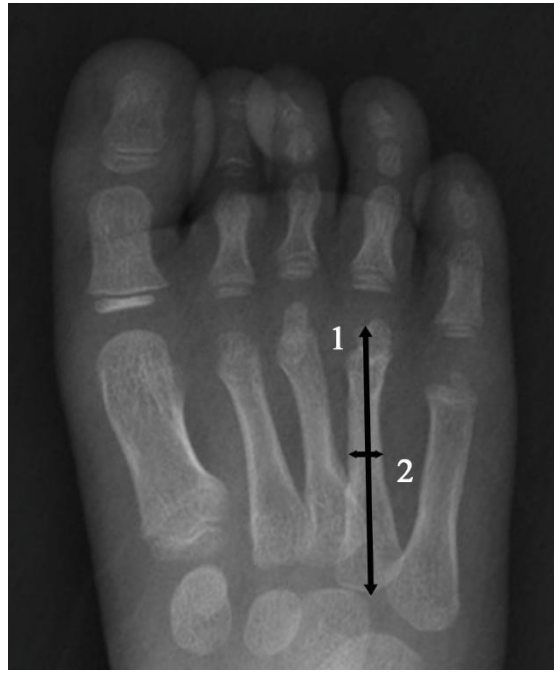

**Supplementary Figure 2:** The measurement of the length and the width of metatarsal on Anteroposterior X-ray film. The longitudinal axis of the metatarsal (line 1) was defined as the longitudinal axis of the bone shaft and line 2 was the midperpendicular of line 1. The length of metatarsal was the distance between the proximal and the distal margins of the articular surface on line 1 and the width of metatarsal was the distance between the medial and the lateral margins of the cortex on line 2. The lengthening and shortening of a metatarsal were defined as a difference of  $>3$  mm in length from the corresponding contralateral metatarsal, and the difference was  $>10\%$ ; the widening or narrowing of a metatarsal were defined as a difference of  $>1$  mm in width from the corresponding contralateral metatarsal, and the difference was  $>20\%$  of the length of the contralateral metatarsal.

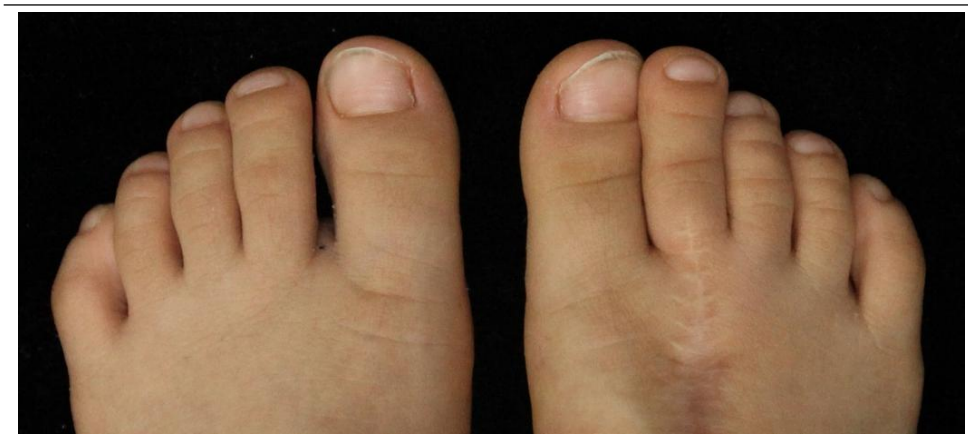

---

(A)

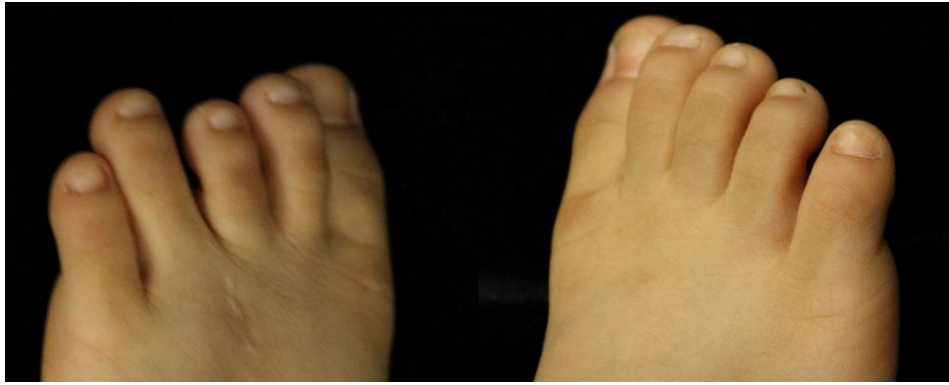

(B)

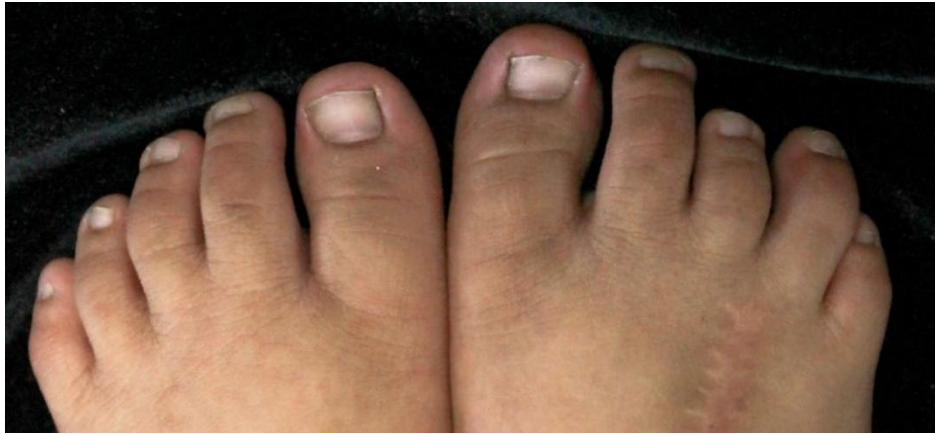

(C)

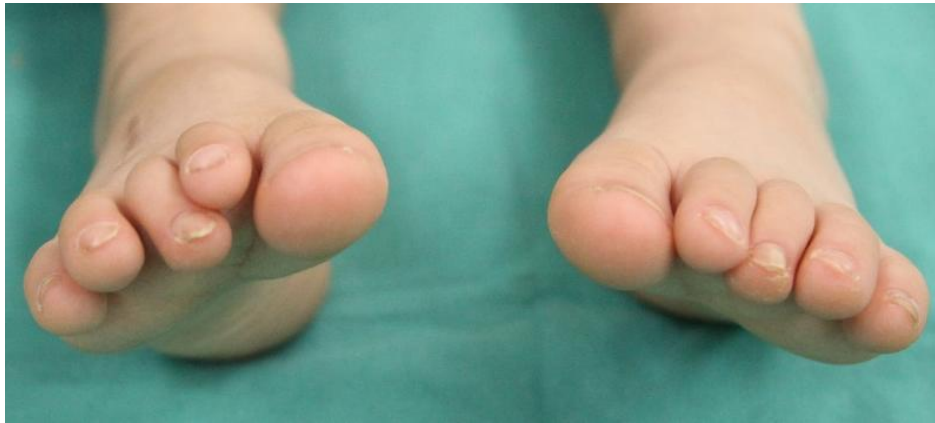

(D)

---

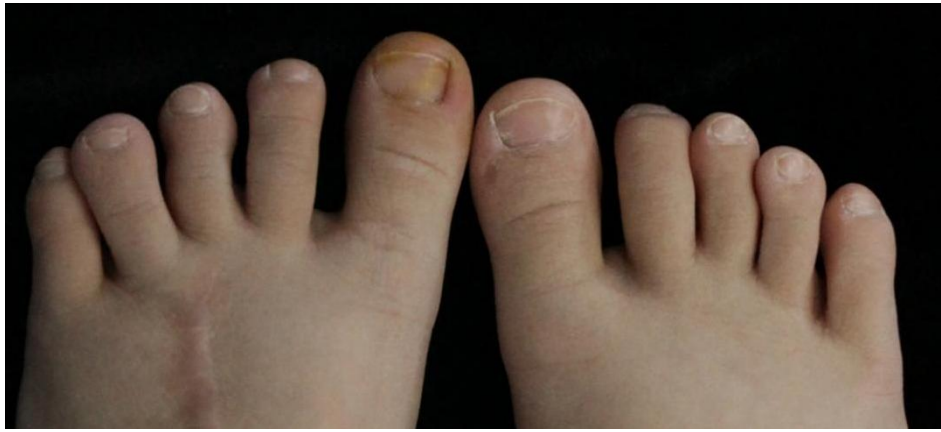

(E)

**Supplementary Figure 3:** Appearances of the donor foot. (A) Normal right foot. (B) The lengthening of the left 4th toe. (C) The shortening of the right 3rd toe. (D) The 2nd toe overriding on the 3rd toe after right 4th metatarsal transfer. (E) The lateral deviation of the left 4th toe. The lengthening of a toe was defined as the tip of the toe being longer than that of its medial toe. The shortening of a toe was defined as the tip of the toe being shorter than that of its lateral toe. For patients whose 2nd toe was longer than the big toe in the contralateral foot, the donor 2nd toe was defined as “lengthening” if the difference between the tips of the 2nd toe and big toe in the donor site was more than twice that of the contralateral side; and as “shortening” if the tip of the 2nd toe was shorter than that of big toe.

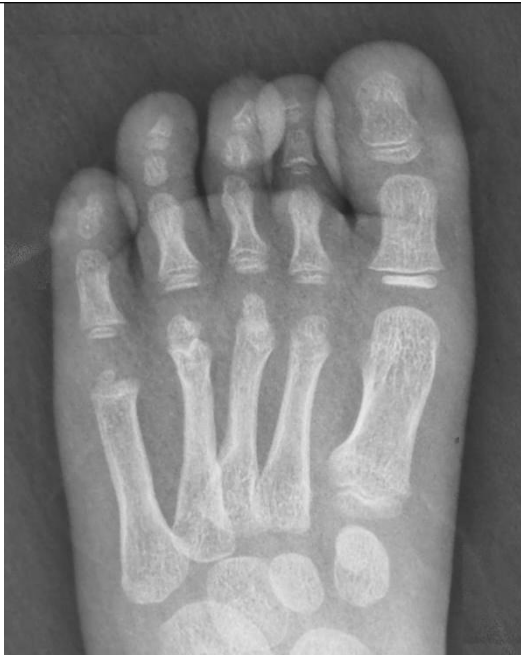

(A)

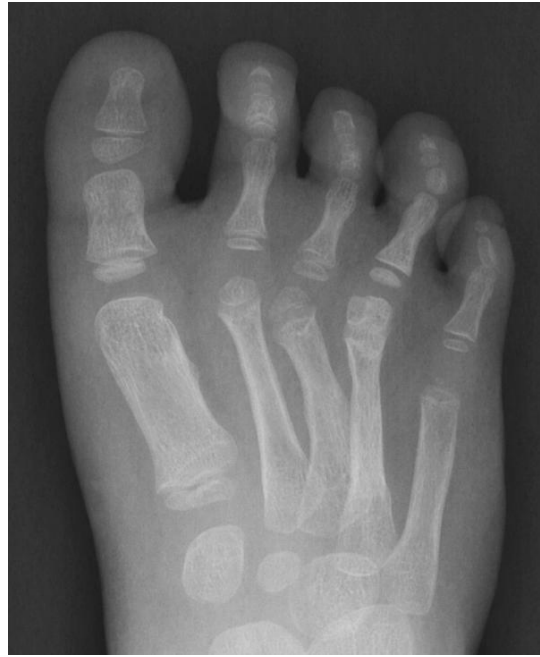

(B)

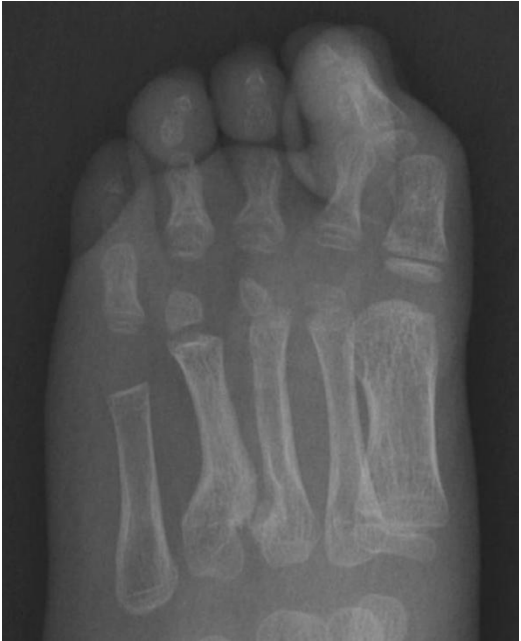

(C)

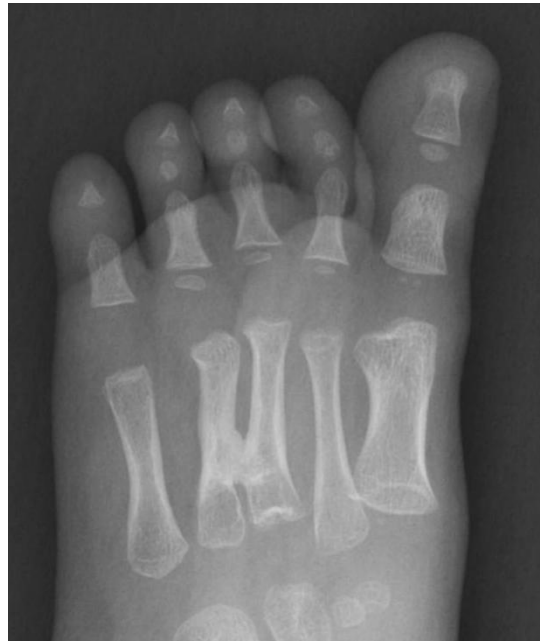

(D)

**Supplementary Figure 4:** The radiographic findings of donor metatarsals. (A) Normal 3rd and 4th metatarsals. (B) The lengthening of the 4th metatarsal. (C) The angulation deformity of the 4th metatarsal. (D) The synostosis between the 4th and 3rd metatarsals.
